# Supplementary material
Source: Research Square preprint supplement (doi:10.21203/rs.3.rs-10080516/v1)
Supplement: Supplementary file 1 [file 0a94ec510ca20ad172ee0d65.docx]

**Table S1. Definition of CKM syndrome**

| **CKM syndrome stages** | **Definition** |
| --- | --- |
| Stage 0: No CKM health  risk factors | Participants with normal body mass index (BMI) (<23 kg/m2 for individuals with Asian ethnicity and <25 kg/m2 for other racial and ethnic groups), normal waist circumference (<80 and <90 cm for women and men with Asian race, respectively, and <88 and <102 cm for women and men in all other race and ethnicity categories, respectively) who did not meet criteria for the other stages. |
| Stage 1: Excess or  dysfunctional adiposity | Individuals with overweight/obesity, abdominal obesity, or adipose tissue dysfunction without other metabolic risk factors, CKD, or subclinical/clinical CVD (1)BMI (≥23 kg/m2 for individuals with Asian race and >25 kg/m2 for all other race and ethnic groups) (2)WC ≥ 102 cm for men or ≥ 88 cm for women (3)FBG levels ranging from 100 to 124 mg/dL, or HbA1c levels between 5.7 and 6.4 % |
| Stage 2: Metabolic risk  factors and moderate to  high-risk CKD | Qualifying metabolic risk factors included elevated fasting serum triglycerides (≥135 mg/dL), hypertension, diabetes, or metabolic syndrome (≥3 of the following: elevated waist circumference, low high density lipoprotein cholesterol (HDL) level [<40 mg/dL or <50 mg/dL for men or women, respectively], fasting serum triglycerides ≥150 mg/dL, elevated blood pressure [systolic blood pressure ≥130, diastolic blood pressure ≥80 mmHg, and/or use of blood pressure-lowering medications], or prediabetes). CKD stages were identified based on GFR and urinary albumin-tocreatinine ratio. |
| Stage 3: Subclinical CVD  in CKM | Presence of very-high-risk KDIGO CKD stages or a high-estimated 10-year cardiovascular disease (CVD) risk. The 10-year CVD risk was assessed using the AHA PREVENT equations for predicting cardiovascular events. A 10-year CVD risk of 20% or greater was classified as high risk. |
| Stage 4: Clinical CVD in  CKM | Reported history of established cardiovascular conditions, including coronary heart disease, angina, myocardial infarction, heart failure, and cerebrovascular accident. |

Abbreviations: CKM syndrome, Cardiovascular-Kidney-Metabolic syndrome; NHANES, National Health and Nutrition Examination Survey; MeTS, metabolic syndrome; CKD, chronic kidney disease; CVD, cardiovascular disease; BMI, body mass index; WC, waist circumference; FBG, fasting blood glucose; HbA1c, glycated hemoglobin A1c; KDIGO, Kidney Disease Improving Global Outcomes; UACR, urine albumin-to-creatinine ratio; eGFR, estimated glomerular filtration rate; TG, triglycerides; SBP, systolic blood pressure; DBP, diastolic blood pressure.

Reference

Aggarwal R, Ostrominski JW, Vaduganathan M. Prevalence of cardiovascular-kidney-metabolic syndrome stages in US adults, 2011-2020.

**Table S2 Baseline characteristics of the study population based on the change in CTI**

| Characteristic | | Overall |  |  |  | | --- | --- | --- | --- | | (n=4452) |  |  | | | Cluster1 |  |  | | --- | --- | --- | | (n=890) |  | | | Cluster2 |  | | --- | --- | | (n=1569) |  | | | Cluster3 |  | | --- | --- | | (n=1993) |  | | Pvalue |
| --- | --- | --- | --- | --- | --- | --- | --- | --- | --- | --- | --- | --- | --- | --- | --- | --- | --- | --- | --- | --- | --- | --- | --- | --- | --- |
| Age(mean ± SD) | 58.0±8.5 | 58.3±8.3 | 57.6±8.5 | 58.1±8.5 | 0.098 |
| Gender, n(%) |  |  |  |  | 0.007 |
| Female | 2428(54.5) | 506(56.9) | 806(51.4) | 1116(44.0) |  |
| Male | 2024(45.5) | 384(43.1) | 763(48.6) | 877(56.0) |  |
| Educational level, n(%) |  |  |  |  | 0.653 |
| Unread books | 1312(29.5) | 274 (30.8) | 472 (30.1) | 566 (28.4) |  |
| Literate without formal education | 822(18.5) | 150 (16.9) | 295 (18.8) | 377 (18.9) |  |
| Primary school | 981(22.0) | 198 (22.2) | 329 (21.0) | 454 (22.8) |  |
| Middle school | 895(20.1) | 187 (21.0) | 309 (19.7) | 399 (20.0) |  |
| High school and above | 442(9.9) | 81 (9.1) | 164 (10.4) | 197 (9.9) |  |
| Smoking status, n(%) |  |  |  |  | 0.022 |
| Current | 2831(63.6) | 574(64.5) | 981(62.5) | 1276(64.0) |  |
| Ever | 321(7.2) | 62(7.0) | 94(6.0) | 165(8.3) |  |
| Never | 1300(29.2) | 254(28.5) | 494(31.5) | 552(27.7) |  |
| Drinking status, n(%) |  |  |  |  | 0.032 |
| Current | 2687(60.1) | 546(61.3) | 926(59.0) | 1215(61.0) |  |
| Ever | 341(7.7) | 79(8.9) | 102(6.5) | 160(8.0) |  |
| Never | 1424(32.0) | 265(29.8) | 541(34.5) | 618(31.0) |  |
| Residence, n(%) |  |  |  |  | <0.001 |
| Rural | 3834(86.1) | 743 (83.483) | 1383 (88.1) | 1708 (85.7) |  |
| Urban | 618(13.9) | 147 (16.517) | 186 (11.9) | 285 (14.3) |  |
| Marital Status, n(%) |  |  |  |  | 0.221 |
| Married | 3993(89.7) | 798 (89.7) | 1423 (90.7) | 1772 (88.9) |  |
| Other | 459(10.3) | 92 (10.3) | 146 (9.3) | 221 (11.1) |  |
| Work Status, n(%) |  |  |  |  | <0.001 |
| Worked | 3209(72.1) | 585 (65.7) | 1226 (78.1) | 1398 (70.1) |  |
| Other | 1243(27.9) | 305 (34.3) | 343 (21.9) | 595 (29.9) |  |
| CRP, mg/L[M(Q1, Q3)] | 1.0(0.5,2.0) | 2.8(1.5,6.0) | 0.5(0.4,0.8) | 1.1(0.7,1.9) | <0.001 |
| TG, mg/dL[M(Q1, Q3)] | 101.8(73.5,149.6) | 174.8(121.2,262.0) | 76.1(60.2,101.8) | 108.0(80.5,147.8) | <0.001 |
| FPG, mg/dL[M(Q1, Q3)] | 102.1(94.7,111.8) | 112.0(101.7,135.0) | 98.5(92.2,105.8) | 102.1(95.0,110.5) | <0.001 |
| CTI2011(mean ± SD) | 4.7±0.6 | 5.5±0.4 | 4.2±0.3 | 4.8±0.3 | <0.001 |
| CTI2015(mean ± SD) | 4.8±0.6 | 5.6±0.5 | 4.2±0.3 | 4.9±0.3 | <0.001 |
| CKM Stage 4, n(%) |  |  |  |  | <0.001 |
| No | 3269(73.4) | 603 (67.8) | 1227 (78.2) | 1439 (72.2) |  |
| Yes | 1183(26.6) | 287 (32.2) | 342 (21.8) | 554 (27.8) |  |

****Note:**** Normally or approximately normally distributed continuous variables are presented as mean ± standard deviation (SD); non‑normally distributed variables are expressed as median (interquartile range). Categorical variables are reported as frequency (percentage).CRP, C‑reactive protein; TG, triglycerides; FPG, fasting plasma glucose; CTI2011, C‑reactive protein–triglyceride–glucose index in 2011; CTI2015, C‑reactive protein–triglyceride–glucose index in 2015.

**Table S3 Baseline characteristics and cumulative metabolic changes stratified by incident CKM stage 4 status**

| Characteristic | | Overall | | --- | | (n=4452) | | CKM stage 4 | | Pvalue |
| --- | --- | --- | --- | --- | --- | --- |
| No(n=3269) | Yes(n=1183) |
| Age(mean ± SD) | 58.0±8.5 | 57.5±8.6 | 59.2±8.1 | <0.001 |
| Gender, n(%) |  |  |  | 0.005 |
| Female | 2428(54.5) | 1742(53.3) | 686(58.0) |  |
| Male | 2024(45.5) | 1527(46.7) | 497(42.0) |  |
| Educational level, n(%) |  |  |  | 0.080 |
| Unread books | 1312(29.5) | 944(28.9) | 368(31.1) |  |
| Literate without formal education | 822(18.5) | 604(18.5) | 218(18.5) |  |
| Primary school | 981(22.0) | 711(21.7) | 270(22.8) |  |
| Middle school | 895(20.1) | 690(21.1) | 205(17.3) |  |
| High school and above | 442(9.9) | 320(9.8) | 122(10.3) |  |
| Smoking status, n(%) |  |  |  | 0.016 |
| Current | 2831(63.6) | 2063(63.1) | 768(64.9) |  |
| Ever | 321(7.2) | 220(6.7) | 101(8.5) |  |
| Never | 1300(29.2) | 986(30.2) | 314(26.6) |  |
| Drinking status, n(%) |  |  |  | <0.001 |
| Current | 2687(60.1) | 1961(60.0) | 726(61.3) |  |
| Ever | 341(7.7) | 224(6.9) | 117(10.0) |  |
| Never | 1424(32.0) | 1084(33.1) | 340(28.7) |  |
| Residence, n(%) |  |  |  | 0.290 |
| Rural | 3834(86.1) | 2826(86.4) | 1008(85.2) |  |
| Urban | 618(13.9) | 443(13.6) | 175(14.8) |  |
| Marital Status, n(%) |  |  |  | 0.044 |
| Married | 3993(89.7) | 2950(90.2) | 1043(88.2) |  |
| Other | 459(10.3) | 319(9.8) | 140(11.8) |  |
| Work Status, n(%) |  |  |  | <0.001 |
| Worked | 3209(72.1) | 2419(74.0) | 790(66.8) |  |
| Other | 1243(27.9) | 850(26.0) | 393(33.2) |  |
| CRP, mg/L[M(Q1, Q3)] | 1.0(0.5,2.0) | 0.9(0.5,2.0) | 1.1(0.6,2.2) | <0.001 |
| TG, mg/dL[M(Q1, Q3)] | 101.8(73.5,150.) | 100.0(71.7,146.9) | 106.2(77.9,155.8) | <0.001 |
| FPG, mg/dL[M(Q1, Q3)] | 102.1(94.7,111.8) | 101.7(94.5,111.1) | 103.1(95.4,114.1) | <0.001 |
| CTI2011(mean ± SD) | 4.7±0.6 | 4.7±0.6 | 4.8±0.6 | <0.001 |
| CTI2015(mean ± SD) | 4.8±0.6 | 4.8±0.6 | 4.9± 0.6 | <0.001 |
| CuCTI Q, n(%) |  |  |  | <0.001 |
| Q1 | 1484(33.3) | 1162(35.5) | 322(27.2) | <0.001 |
| Q2 | 1484(33.3) | 1082(33.1) | 402(34.0) |  |
| Q3 | 1484(33.3) | 1025(31.4) | 459(38.8) |  |
| Cluster 1-3, n(%) |  |  |  | <0.001 |
| Cluster1 | 890(20.0) | 603(18.5) | 287(24.3) |  |
| Cluster2 | 1569(35.2) | 1227(37.5) | 342(28.9) |  |
| Cluster3 | 1993(44.8) | 1439(44.0) | 554(46.8) |  |

****Note:**** Normally or approximately normally distributed continuous variables are presented as mean ± standard deviation (SD); non‑normally distributed variables are expressed as median (interquartile range). Categorical variables are reported as frequency (percentage).CRP, C‑reactive protein; TG, triglycerides; FPG, fasting plasma glucose; CTI2011, C‑reactive protein–triglyceride–glucose index in 2011; CTI2015, C‑reactive protein–triglyceride–glucose index in 2015.
